# Supplementary material for: Ionothermal synthesis, structure and characterization of three-dimensional zinc phosphates
Source: Royal Society of Chemistry journal article supplement (doi:10.1039/b906934h), 2009-01-01
Supplement: b906934h.pdf [file b906934h.pdf]

## Supplementary Material

### Ionothermal Synthesis, Structure and Characterization of Three-dimensional Zinc phosphates

Lei Liu,<sup>a</sup> David S. Wragg,<sup>b</sup> Hongyan Zhang,<sup>a</sup> Ying Kong,<sup>a</sup> Peter J. Byrne,<sup>b</sup> Timothy J. Prior,<sup>c</sup> John E. Warren,<sup>c</sup> Zhuojia Lin,<sup>b</sup> Jinxiang Dong\*<sup>a</sup> and Russell E. Morris<sup>b</sup>

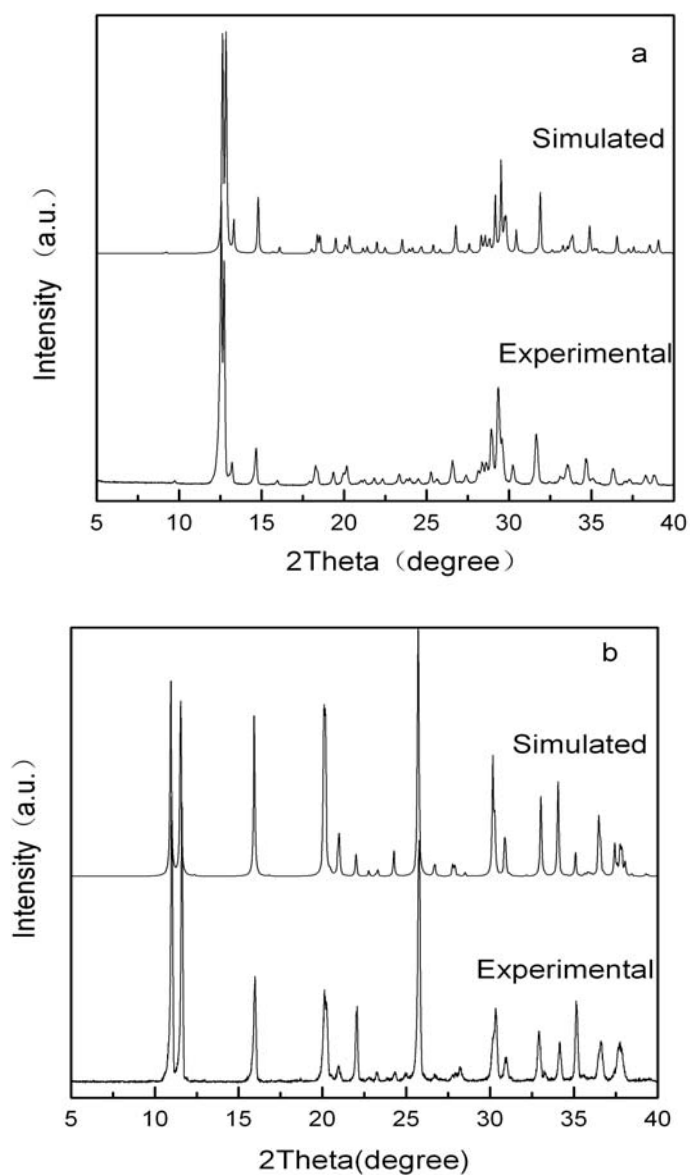

Figure S1. Experimental and simulated X-ray power diffraction patterns for ZnPO<sub>4</sub>-EU2 (a) and ZnPO<sub>4</sub>-EU3 (b)

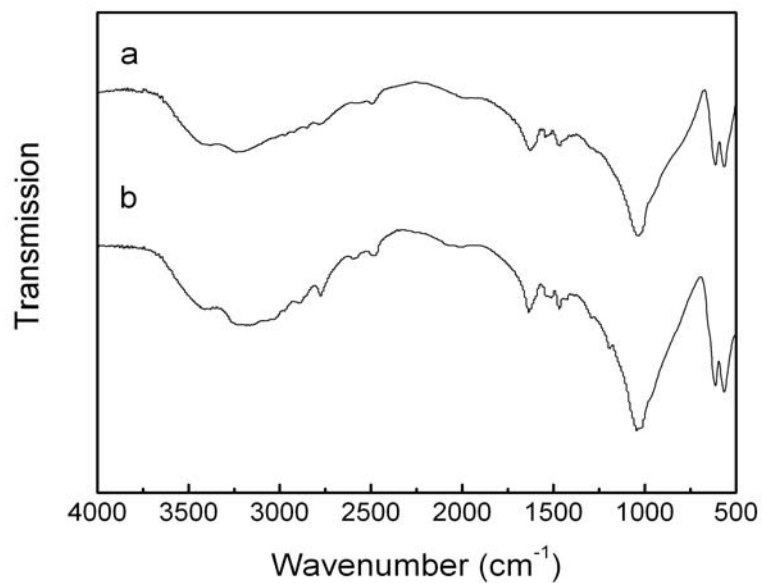

Figure S2. FT-IR spectrums for ZnPO<sub>4</sub>-EU2 (a) and ZnPO<sub>4</sub>-EU3 (b) (KBr pellet)

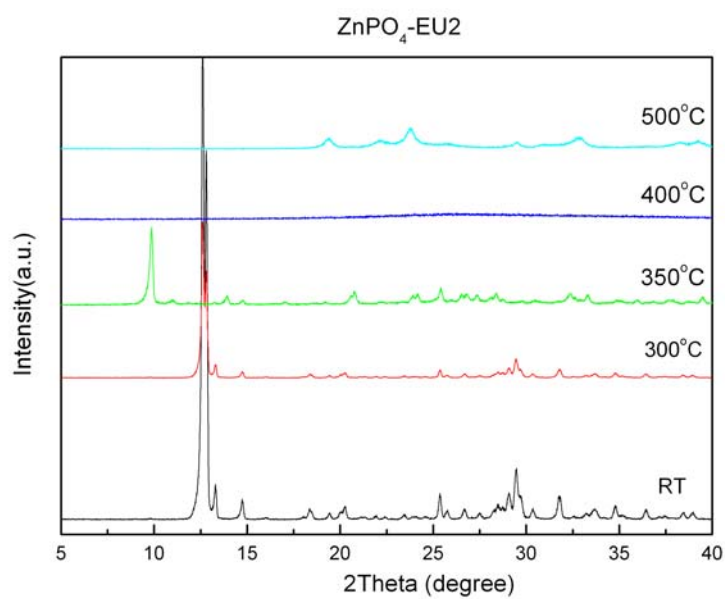

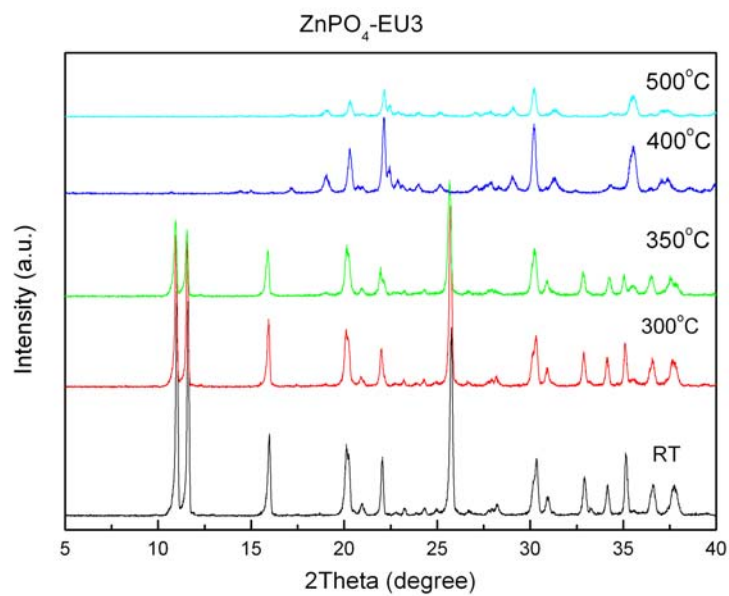

Figure S3. X-ray powder diffraction patterns of the two products as a function of temperature.
